# Supplementary material for: The vaginal immunoproteome for the prediction of spontaneous preterm birth: A retrospective longitudinal study
Source: eLife. 2024 Jun 24;13:e90943. doi: 10.7554/eLife.90943 (PMC11196114; doi:10.7554/eLife.90943)
Supplement: Figure 2—source data 1. [file elife-90943-fig2-data1.xlsx]

## Sheet: Figure 2-source data 1
Figure 2-source data 1. Vaginal immune mediator shifts across gestational age in term uncomplicated pregnancies.
ID	Estimate	P	q
β-defensin-2	-0.04934	6.11e-12	1.71e-10
GM-CSF	-0.02317	0.002109	0.008437
IFN-γ	-0.00184	0.844497	0.909459
IL-10	-0.00319	0.571412	0.714788
IL-12/IL-23p40	-0.03247	3.63e-05	0.000254
IL-12p70	-0.00168	0.840536	0.909459
IL-13	-0.00499	0.328481	0.459874
IL-15	-0.01093	0.306796	0.45212
IL-16	0.012599	0.138949	0.274844
IL-17A	-0.01003	0.227846	0.358785
IL-1α	-0.02485	1.15e-07	1.61e-06
IL-1β	-0.02444	2.88e-05	0.000254
IL-2	-0.01549	0.001523	0.007109
IL-4	0.000429	0.956026	0.991434
IL-5	-0.01065	0.230648	0.358785
IL-6	-0.01265	0.147238	0.274844
IL-7	0.01401	0.201841	0.353222
CXCL8	-0.01015	0.009063	0.028196
CXCL8 (HA)	0.009651	0.077783	0.181493
CXCL10	0.023074	0.000185	0.001037
CCL2	0.008454	0.127861	0.274844
CCL3	-0.00307	0.76913	0.897319
CCL4	0.004546	0.587147	0.714788
SLPI	0.014271	0.047962	0.122084
CCL17	0.01627	0.022568	0.06319
TNF	-4.37e-06	0.999489	0.999489
LT-α	0.005965	0.567163	0.714788
VEGF	0.014868	0.00383	0.013404
HA = High affinity
