# Supplementary material for: The vaginal immunoproteome for the prediction of spontaneous preterm birth: A retrospective longitudinal study
Source: eLife. 2024 Jun 24;13:e90943. doi: 10.7554/eLife.90943 (PMC11196114; doi:10.7554/eLife.90943)
Supplement: Figure 2—source data 2. [file elife-90943-fig2-data2.xlsx]

## Sheet: cyt_quantilesvsGA
Figure 2-source data 2: 10th, 50th, and 95th quantiles of vaginal immune mediator concentrations weekly across gestation resulting in term birth.
GA	IFN-γ_10th	IFN-γ_50th	IFN-γ_95th	IL-10_10th	IL-10_50th	IL-10_95th	IL-12p70_10th	IL-12p70_50th	IL-12p70_95th	IL-13_10th	IL-13_50th	IL-13_95th	IL-1β_10th	IL-1β_50th	IL-1β_95th	IL-2_10th	IL-2_50th	IL-2_95th	IL-4_10th	IL-4_50th	IL-4_95th	IL-6_10th	IL-6_50th	IL-6_95th	CXCL8_10th	CXCL8_50th	CXCL8_95th	TNF_10th	TNF_50th	TNF_95th	GM-CSF_10th	GM-CSF_50th	GM-CSF_95th	IL-12/IL-23p40_10th	IL-12/IL-23p40_50th	IL-12/IL-23p40_95th	IL-15_10th	IL-15_50th	IL-15_95th	IL-16_10th	IL-16_50th	IL-16_95th	IL-17A_10th	IL-17A_50th	IL-17A_95th	IL-1α_10th	IL-1α_50th	IL-1α_95th	IL-5_10th
10	0.172627	0.759096	4.91722	0.300616	0.62884	1.21511	0.194934	0.513865	1.50015	11.4393	20.016	44.74	53.9517	100.544	226.202	0.710521	1.24237	2.03342	0.0561684	0.126045	0.692261	3.33252	11.0528	35.3797	1775.59	3024.3	4935.9	0.96841	2.47091	5.30021	0.203354	0.614013	1.26375	0.469598	1.3293	2.92865	0.00964241	0.0489803	0.667381	14.7473	37.8752	224.345	0.520232	1.42464	4.29037	588.375	1143.6	1522.56	0.0621219
11	0.158485	0.767615	4.88501	0.286266	0.631244	1.25726	0.186234	0.520232	1.53773	11.0924	20.0392	45.4029	51.3602	98.9115	231.695	0.685601	1.23154	2.08076	0.0548679	0.127513	0.683918	3.17444	11.0671	36.6688	1716.33	3011.38	5024.09	0.937617	2.48525	5.47722	0.185863	0.610932	1.28561	0.437998	1.30777	2.97594	0.00873405	0.0473364	0.663723	14.5207	38.4026	227.238	0.481568	1.42455	4.42654	564.053	1130.76	1537.87	0.057126
12	0.145502	0.776231	4.85301	0.272601	0.633658	1.30086	0.177923	0.526678	1.57624	10.756	20.0625	46.0757	48.8931	97.3059	237.322	0.661555	1.2208	2.1292	0.0535975	0.128998	0.675676	3.02386	11.0814	38.0049	1659.05	2998.52	5113.87	0.907803	2.49967	5.66015	0.169876	0.607866	1.30785	0.408525	1.28658	3.02399	0.00791126	0.0457476	0.660085	14.2977	38.9374	230.169	0.445778	1.42446	4.56704	540.737	1118.06	1553.34	0.0525319
13	0.133582	0.784943	4.82122	0.259588	0.63608	1.34597	0.169982	0.533204	1.61573	10.4299	20.0858	46.7585	46.5446	95.7264	243.085	0.638353	1.21016	2.17877	0.0523565	0.130501	0.667533	2.88042	11.0957	39.3896	1603.68	2985.71	5205.25	0.878937	2.51417	5.84918	0.155264	0.604816	1.33047	0.381034	1.26574	3.07282	0.00716598	0.0442122	0.656467	14.0781	39.4796	233.138	0.412648	1.42437	4.712	518.385	1105.5	1568.96	0.0483073
14	0.122639	0.793753	4.78963	0.247196	0.638512	1.39265	0.162396	0.53981	1.6562	10.1136	20.1091	47.4514	44.3089	94.1725	248.989	0.615964	1.19961	2.22949	0.0511443	0.13202	0.659488	2.74378	11.11	40.8248	1550.15	2972.96	5298.26	0.850989	2.52876	6.04452	0.141909	0.601781	1.35349	0.355394	1.24523	3.12244	0.00649091	0.0427283	0.652868	13.8618	40.0294	236.145	0.38198	1.42428	4.86156	496.957	1093.08	1584.74	0.0444224
15	0.112592	0.802662	4.75826	0.235395	0.640953	1.44095	0.155148	0.546498	1.69768	9.80689	20.1324	48.1545	42.1806	92.6439	255.035	0.594361	1.18915	2.28139	0.0499601	0.133558	0.65154	2.61363	11.1244	42.3122	1498.42	2960.26	5392.93	0.82393	2.54343	6.24639	0.129703	0.598761	1.3769	0.331479	1.22506	3.17286	0.00587943	0.0412942	0.64929	13.6489	40.5868	239.191	0.353591	1.4242	5.01587	476.414	1080.81	1600.68	0.0408499
16	0.103368	0.811671	4.72708	0.224159	0.643404	1.49093	0.148224	0.55327	1.7402	9.50951	20.1558	48.8681	40.1545	91.1401	261.228	0.573515	1.17878	2.3345	0.0488033	0.135114	0.643688	2.48965	11.1388	43.8539	1448.41	2947.62	5489.29	0.797731	2.55818	6.455	0.118546	0.595757	1.40072	0.309174	1.20521	3.2241	0.00532556	0.0399083	0.645731	13.4392	41.152	242.276	0.327312	1.42411	5.17507	456.72	1068.67	1616.78	0.0375648
17	0.0949003	0.820781	4.69612	0.213458	0.645863	1.54264	0.141609	0.560125	1.78379	9.22114	20.1792	49.5923	38.2257	89.6606	267.572	0.5534	1.1685	2.38885	0.0476734	0.136687	0.635931	2.37155	11.1532	45.4517	1400.07	2935.03	5587.38	0.772365	2.57302	6.67057	0.10835	0.592767	1.42495	0.288369	1.18569	3.27616	0.00482387	0.0385688	0.642192	13.2328	41.7251	245.401	0.302986	1.42402	5.33933	437.841	1056.67	1633.04	0.0345438
18	0.087126	0.829993	4.66535	0.203268	0.648333	1.59614	0.135289	0.567065	1.82847	8.94151	20.2026	50.3271	36.3896	88.2052	274.07	0.533991	1.15832	2.44446	0.0465696	0.138279	0.628267	2.25905	11.1676	47.1078	1353.34	2922.49	5687.22	0.747806	2.58795	6.89335	0.0990298	0.589793	1.4496	0.268964	1.16648	3.32906	0.00436943	0.0372744	0.638672	13.0295	42.3061	248.566	0.280468	1.42393	5.5088	419.742	1044.8	1649.46	0.0317657
19	0.0799885	0.839309	4.63479	0.193565	0.650811	1.65149	0.129251	0.574091	1.87427	8.67036	20.226	51.0729	34.6416	86.7735	280.726	0.515263	1.14822	2.50137	0.0454913	0.13989	0.620695	2.15189	11.182	48.8242	1308.17	2910.01	5788.84	0.724028	2.60296	7.12357	0.0905118	0.586833	1.47468	0.250865	1.14758	3.38282	0.00395781	0.0360233	0.635171	12.8294	42.8953	251.772	0.259623	1.42385	5.68366	402.391	1033.07	1666.05	0.0292111
20	0.0734357	0.848729	4.60443	0.184325	0.653299	1.70877	0.123483	0.581204	1.92122	8.40744	20.2495	51.8297	32.9777	85.3649	287.543	0.497191	1.13821	2.5596	0.044438	0.141519	0.613215	2.04982	11.1965	50.6031	1264.51	2897.58	5892.28	0.701005	2.61807	7.36147	0.0827264	0.583889	1.50019	0.233984	1.12899	3.43744	0.00358497	0.0348143	0.631689	12.6323	43.4926	255.019	0.240328	1.42376	5.86406	385.758	1021.46	1682.8	0.026862
21	0.0674198	0.858255	4.57427	0.175526	0.655797	1.76803	0.117972	0.588405	1.96934	8.15249	20.273	52.5977	31.3936	83.9792	294.526	0.479753	1.12828	2.61919	0.0434091	0.143167	0.605825	1.95258	11.211	52.4469	1222.31	2885.21	5997.57	0.678715	2.63325	7.60732	0.0756107	0.580959	1.52614	0.218239	1.1107	3.49295	0.00324725	0.0336458	0.628227	12.4383	44.0983	258.308	0.222467	1.42367	6.05018	369.812	1009.99	1699.73	0.0247017
22	0.0618967	0.867887	4.5443	0.167147	0.658304	1.82935	0.112707	0.595695	2.01867	7.90527	20.2965	53.3772	29.8857	82.6161	301.678	0.462927	1.11845	2.68016	0.0424041	0.144834	0.598524	1.85996	11.2255	54.3578	1181.51	2872.88	6104.74	0.657134	2.64853	7.86138	0.0691071	0.578043	1.55254	0.203553	1.09271	3.54935	0.00294134	0.0325166	0.624783	12.2472	44.7123	261.64	0.205933	1.42358	6.24222	354.525	998.647	1716.82	0.0227152
23	0.056826	0.877628	4.51453	0.159168	0.660821	1.8928	0.107677	0.603076	2.06924	7.66555	20.3201	54.1681	28.4501	81.275	309.004	0.446691	1.1087	2.74256	0.0414222	0.146521	0.59131	1.77173	11.24	56.3383	1142.08	2860.61	6213.82	0.636239	2.6639	8.12392	0.0631628	0.575143	1.5794	0.189856	1.075	3.60666	0.00266425	0.0314252	0.621359	12.0591	45.335	265.015	0.190628	1.4235	6.44035	339.87	987.431	1734.09	0.0208884
24	0.0521708	0.887479	4.48495	0.15157	0.663347	1.95844	0.102871	0.610548	2.12107	7.43309	20.3437	54.9708	27.0836	79.9557	316.508	0.431025	1.09903	2.8064	0.0404632	0.148228	0.584184	1.68769	11.2545	58.3911	1103.96	2848.4	6324.85	0.616008	2.67935	8.39524	0.0577299	0.572257	1.60672	0.17708	1.05759	3.6649	0.00241327	0.0303705	0.617953	11.8738	45.9663	268.433	0.17646	1.42341	6.64476	325.821	976.341	1751.53	0.0192086
25	0.0478969	0.897439	4.45557	0.144334	0.665884	2.02636	0.0982804	0.618113	2.17419	7.20769	20.3673	55.7854	25.7826	78.6578	324.194	0.415907	1.08945	2.87174	0.0395263	0.149954	0.577144	1.60763	11.2691	60.5186	1067.12	2836.23	6437.87	0.59642	2.6949	8.67561	0.0527643	0.569385	1.63451	0.165164	1.04045	3.72408	0.00218592	0.0293512	0.614566	11.6915	46.6064	271.895	0.163346	1.42332	6.85567	312.352	965.376	1769.14	0.0176638
26	0.0439731	0.907512	4.42639	0.137444	0.668429	2.09664	0.0938942	0.625772	2.22865	6.98912	20.3909	56.612	24.5442	77.381	332.067	0.40132	1.07995	2.93859	0.0386111	0.151701	0.570188	1.53137	11.2836	62.7236	1031.5	2824.12	6552.91	0.577456	2.71053	8.96535	0.0482258	0.566528	1.66279	0.15405	1.0236	3.78422	0.00198	0.0283661	0.611197	11.5119	47.2554	275.402	0.151206	1.42323	7.07327	299.441	954.534	1786.94	0.0162433
27	0.0403708	0.917698	4.39739	0.130883	0.670985	2.16936	0.0897038	0.633525	2.28448	6.77718	20.4146	57.4509	23.3652	76.125	340.131	0.387245	1.07054	3.007	0.0377171	0.153467	0.563317	1.45873	11.2982	65.0089	997.075	2812.05	6670	0.559094	2.72626	9.26476	0.0440776	0.563685	1.69155	0.143684	1.00701	3.84532	0.00179347	0.027414	0.607847	11.335	47.9135	278.954	0.139968	1.42315	7.29778	287.063	943.813	1804.91	0.014937
28	0.0370635	0.927998	4.36858	0.124635	0.67355	2.24459	0.0857004	0.641375	2.3417	6.57166	20.4383	58.3023	22.2429	74.8893	348.391	0.373663	1.0612	3.07701	0.0368439	0.155255	0.556528	1.38953	11.3128	67.3776	963.798	2800.04	6789.18	0.541316	2.74207	9.57418	0.0402863	0.560857	1.72081	0.134015	0.9907	3.90741	0.00162452	0.0264939	0.604516	11.1609	48.5807	282.552	0.129566	1.42306	7.52941	275.197	933.213	1823.06	0.0137357
29	0.0340273	0.938413	4.33996	0.118686	0.676125	2.32244	0.0818756	0.649321	2.40035	6.37238	20.462	59.1662	21.1745	73.6736	356.852	0.360558	1.05195	3.14864	0.0359908	0.157063	0.549821	1.32362	11.3275	69.8325	931.631	2788.08	6910.5	0.524104	2.75798	9.89392	0.0368211	0.558042	1.75058	0.124997	0.97465	3.97051	0.00147148	0.0256047	0.601202	10.9895	49.2572	286.196	0.119936	1.42297	7.7684	263.821	922.732	1841.39	0.0126311
30	0.0312397	0.948946	4.31153	0.11302	0.67871	2.40298	0.0782216	0.657366	2.46048	6.17914	20.4858	60.0429	20.1574	72.4778	365.518	0.347912	1.04278	3.22194	0.0351575	0.158892	0.543195	1.26083	11.3421	72.3769	900.538	2776.18	7033.98	0.507439	2.77398	10.2243	0.0336539	0.555242	1.78086	0.116586	0.95886	4.03462	0.00133286	0.0247453	0.597907	10.8207	49.9431	289.888	0.111023	1.42288	8.01497	252.915	912.369	1859.91	0.0116153
31	0.0286805	0.959596	4.28329	0.107625	0.681305	2.48632	0.0747306	0.665511	2.52211	5.99176	20.5095	60.9327	19.1892	71.3013	374.394	0.33571	1.03369	3.29695	0.0343435	0.160743	0.536648	1.20102	11.3568	75.014	870.482	2764.32	7159.67	0.491303	2.79007	10.5658	0.0307592	0.552456	1.81167	0.108741	0.943326	4.09977	0.0012073	0.0239148	0.594629	10.6545	50.6386	293.627	0.102771	1.4228	8.26937	242.461	902.122	1878.62	0.0106812
32	0.026331	0.970367	4.25523	0.102487	0.68391	2.57255	0.0713954	0.673757	2.58528	5.81007	20.5333	61.8356	18.2674	70.1439	383.486	0.323936	1.02468	3.3737	0.0335483	0.162615	0.530181	1.14405	11.3714	77.7471	841.43	2752.51	7287.6	0.475681	2.80626	10.9187	0.0281134	0.549684	1.84301	0.101424	0.928044	4.16598	0.00109357	0.0231122	0.59137	10.4908	51.3438	297.414	0.0951335	1.42271	8.53184	232.438	891.99	1897.51	0.0098222
33	0.0241739	0.981258	4.22735	0.0975947	0.686524	2.66177	0.0682091	0.682105	2.65004	5.63388	20.5572	62.7519	17.39	69.0053	392.799	0.312575	1.01574	3.45224	0.0327715	0.164509	0.523791	1.08978	11.3862	80.5799	813.347	2740.75	7417.82	0.460556	2.82254	11.2833	0.0256953	0.546925	1.87489	0.0945987	0.913009	4.23325	0.000990546	0.0223364	0.588129	10.3296	52.0588	301.25	0.0880631	1.42262	8.80264	222.83	881.972	1916.59	0.00903229
34	0.0221935	0.992271	4.19966	0.0929359	0.689149	2.75409	0.065165	0.690556	2.71641	5.46304	20.581	63.6818	16.5547	67.8852	402.338	0.301612	1.00689	3.53261	0.0320127	0.166425	0.517479	1.03809	11.4009	83.5159	786.201	2729.05	7550.37	0.445911	2.83892	11.6602	0.0234851	0.544181	1.90733	0.088233	0.898218	4.3016	0.000897232	0.0215868	0.584905	10.171	52.7837	305.135	0.0815182	1.42253	9.08204	213.619	872.067	1935.87	0.00830591
35	0.0203754	1.00341	4.17215	0.0884994	0.691784	2.8496	0.0622567	0.699113	2.78446	5.29737	20.6049	64.6254	15.7595	66.7832	412.108	0.291034	0.998109	3.61485	0.0312715	0.168363	0.511243	0.988843	11.4156	86.5588	759.962	2717.39	7685.28	0.431732	2.85539	12.0496	0.021465	0.54145	1.94032	0.0822957	0.883666	4.37106	0.000812708	0.0208623	0.581699	10.0147	53.5188	309.071	0.0754598	1.42245	9.37031	204.788	862.272	1955.34	0.00763795
36	0.0187062	1.01467	4.14482	0.0842748	0.694429	2.94843	0.0594783	0.707775	2.8542	5.13673	20.6288	65.5831	15.0025	65.6992	422.116	0.280826	0.989407	3.699	0.0305475	0.170324	0.505081	0.941936	11.4304	89.7126	734.598	2705.79	7822.61	0.418004	2.87195	12.452	0.0196187	0.538733	1.97389	0.0767579	0.86935	4.44165	0.000736147	0.0201621	0.578511	9.86091	54.264	313.057	0.0698516	1.42236	9.66772	196.323	852.588	1975	0.0070237
37	0.0171738	1.02606	4.11766	0.0802518	0.697083	3.05069	0.0568238	0.716544	2.92569	4.98096	20.6528	66.5549	14.2819	64.6327	432.367	0.270977	0.980781	3.78511	0.0298402	0.172307	0.498994	0.897255	11.4451	92.9813	710.081	2694.23	7962.39	0.404713	2.88861	12.8678	0.0179312	0.53603	2.00803	0.0715928	0.855266	4.51337	0.000666798	0.0194854	0.57534	9.70944	55.0197	317.095	0.0646602	1.42227	9.97458	188.208	843.013	1994.87	0.00645885
38	0.0157669	1.03757	4.09069	0.0764209	0.699748	3.15649	0.0542878	0.725422	2.99898	4.82992	20.6768	67.5412	13.5958	63.5836	442.867	0.261473	0.97223	3.87323	0.0291493	0.174314	0.492981	0.854693	11.4599	96.3691	686.382	2682.72	8104.66	0.391844	2.90537	13.2976	0.0163889	0.53334	2.04277	0.0667752	0.84141	4.58625	0.000603983	0.0188314	0.572186	9.56029	55.7859	321.185	0.0598546	1.42218	10.2912	180.428	833.545	2014.93	0.00593942
39	0.0144753	1.04922	4.06389	0.0727728	0.702424	3.26596	0.051865	0.73441	3.07409	4.68346	20.7008	68.542	12.9428	62.5515	453.622	0.252303	0.963754	3.9634	0.0284744	0.176344	0.487039	0.814149	11.4748	99.8804	663.474	2671.26	8249.48	0.379384	2.92223	13.7417	0.0149792	0.530664	2.0781	0.0622818	0.827779	4.66031	0.000547085	0.0181993	0.56905	9.41344	56.5627	325.328	0.0554062	1.4221	10.6178	172.969	824.183	2035.19	0.00546177
40	0.0132894	1.061	4.03727	0.0692989	0.705109	3.37923	0.0495503	0.74351	3.15109	4.54143	20.7248	69.5577	12.3211	61.5361	464.638	0.243454	0.955351	4.05567	0.0278151	0.178398	0.48117	0.775529	11.4896	103.52	641.33	2659.85	8396.89	0.367321	2.93918	14.2006	0.0136907	0.528001	2.11405	0.0580908	0.814368	4.73556	0.000495546	0.0175885	0.565931	9.26884	57.3504	329.524	0.0512884	1.42201	10.9548	165.819	814.926	2055.66	0.00502253
GA = gestational age. HA = high affinity.
[truncated: 35 more columns]
