# Supplementary material for: The vaginal immunoproteome for the prediction of spontaneous preterm birth: A retrospective longitudinal study
Source: eLife. 2024 Jun 24;13:e90943. doi: 10.7554/eLife.90943 (PMC11196114; doi:10.7554/eLife.90943)
Supplement: Figure 4—source data 1. — Red text values in cells indicate significance of the immune mediator both before and after adjustment for maternal characteristics. Gray highlighted cells indicate significance for immune mediators without adjustment for maternal characteristics. Yellow highlighted cells indicate significance of the immune mediator for the etiology of preterm birth and the gestational age period at delivery. [file elife-90943-fig4-data1.xlsx]

## Sheet: Sheet1
Figure 4-source data 1. Monocyte chemokine and macrophage cytokine concentration differences between term and sPTB cases with and without adjustment for maternal characteristics between term, sPTL, and PPROM cases as well as between term, early sPTL, late sPTL, early PPROM, and late PPROM cases. Red text values in cells indicates significance of the immune mediator both before and after adjustmen…
	Adjusted for GA+BMI+Nulliparity+History of PTB			Adjusted for GA only
ID	Coef_sPTBvsControl	P_sPTBvsControl	Q_sPTBvsControl	Coef_sPTBvsControl	P_sPTBvsControl	Q_sPTBvsControl		Coef_PTLvsControl	P_PTLvsControl	Q_PTLvsControl	Coef_PPROMvsControl	P_PPROMvsControl	Q_PPROMvsControl		Coef_PTL_20.34vsControl	P_PTL_20.34vsControl	Q_PTL_20.34vsControl	Coef_PTL_34.37vsControl	P_PTL_34.37vsControl	Q_PTL_34.37vsControl	Coef_PPROM_20.34vsControl	P_PPROM_20.34vsControl	Q_PPROM_20.34vsControl	Coef_PPROM_34.37vsControl	P_PPROM_34.37vsControl	Q_PPROM_34.37vsControl
CCL2	0.41	0	0.002	0.44	0	0		0.393295	0.00495997	0.0173599	0.407086	0.00794275	0.057368		0.393383	0.105049	0.338311	0.405648	0.00961834	0.0384733	0.71903	0.00260017	0.0154514	0.229688	0.204602	0.939059
CCL3	0.93	0	0	1.08	0	0		1.03454	2.66e-05	0.000247859	0.705701	0.0103066	0.057717		0.784184	0.0691	0.322467	1.08431	9.8e-05	0.00274299	1.1339	0.00689615	0.0275846	0.426468	0.198897	0.939059
CCL4	0.98	0	0	1.05	0	0		1.06827	1.3e-05	0.000182263	0.789852	0.00365231	0.0511324		1.23697	0.00339886	0.047584	0.981692	0.000433698	0.00404785	1.67692	4.61e-05	0.000645676	0.259804	0.4303	0.939059
IL-12/IL-23p40	0.35	0.047	0.083	0.42	0.012	0.021		0.340375	0.120156	0.177073	0.281775	0.250135	0.46692		0.459929	0.237075	0.390476	0.240266	0.328854	0.383663	0.872542	0.0200254	0.0467259	-0.0553983	0.851917	0.939059
IL-12p70	0.26	0.066	0.108	0.36	0.008	0.016		0.461664	0.00772928	0.0228347	-0.0127467	0.947801	0.947801		0.374026	0.228853	0.390476	0.474034	0.0143625	0.0446834	0.0122538	0.967677	0.967677	-0.0275704	0.905521	0.939059
IL-15	0.35	0.076	0.118	0.41	0.026	0.043		0.463377	0.0511896	0.0895818	0.141788	0.594526	0.723771		0.121464	0.772895	0.879063	0.551401	0.0392256	0.0784512	1.00373	0.0143907	0.037119	-0.344164	0.280538	0.939059
