# Supplementary material for: The vaginal immunoproteome for the prediction of spontaneous preterm birth: A retrospective longitudinal study
Source: eLife. 2024 Jun 24;13:e90943. doi: 10.7554/eLife.90943 (PMC11196114; doi:10.7554/eLife.90943)
Supplement: Figure 7—source data 1. — AUC and AUPR calculations used preterm birth and related subgroups as the positive group while the reference (i.e., negative) group always constituted normal pregnancy group controls. [file elife-90943-fig7-data1.xlsx]

## Sheet: bootstrapAUC_AUPR
Figure 7-source data 1: Comparison of AUC vs AUPR Statistics for vaginal immunoproteome predictive models of sPTB and subtypes. AUC and AUPR calculations used preterm birth and related subgroups as the positive group while the reference (i.e., negative) group was always constituted of normal pregnancy group controls.
						Null distribution from 300 permutations
Outcome	Predictors	Statistic	N Controls	N Cases	Observed*	Mean	2.5th	97.5th	Obs>97.5th
PTL_PPROM	Proteins	AUC	490	222	0.612	0.520847	0.486425	0.568525	Sig
PTL_PPROM	Proteins + Maternal characteristics	AUC	490	222	0.68	0.523877	0.48285	0.567625	Sig
PTL_PPROM	Proteins	AUPR	490	222	0.417787	0.312877	0.270748	0.360657	Sig
PTL_PPROM	Proteins + Maternal characteristics	AUPR	490	222	0.510605	0.311093	0.274852	0.360823	Sig
PTL	Proteins	AUC	490	126	0.576	0.52719	0.4799	0.58905	NS
PTL	Proteins + Maternal characteristics	AUC	490	126	0.67	0.52656	0.486	0.585	Sig
PTL	Proteins	AUPR	490	126	0.278198	0.207323	0.173855	0.254729	Sig
PTL	Proteins + Maternal characteristics	AUPR	490	126	0.337085	0.206781	0.174242	0.248976	Sig
PPROM	Proteins	AUC	490	96	0.635	0.530953	0.484	0.602	Sig
PPROM	Proteins + Maternal characteristics	AUC	490	96	0.673	0.529163	0.488	0.589	Sig
PPROM	Proteins	AUPR	490	96	0.299532	0.167117	0.129526	0.210834	Sig
PPROM	Proteins + Maternal characteristics	AUPR	490	96	0.277687	0.16801	0.134011	0.209228	Sig
PPROM<34	Proteins	AUC	490	29	0.764	0.552833	0.47595	0.653	Sig
PPROM<34	Proteins + Maternal characteristics	AUC	490	29	0.772	0.55026	0.455475	0.642	Sig
PPROM<34	Proteins	AUPR	490	29	0.190668	0.061355	0.0394882	0.112484	Sig
PPROM<34	Proteins + Maternal characteristics	AUPR	490	29	0.169678	0.0614686	0.0410885	0.119676	Sig
PTL<34	Proteins	AUC	490	24	0.657	0.5542	0.472	0.6531	Sig
PTL<34	Proteins + Maternal characteristics	AUC	490	24	0.673	0.556773	0.471	0.669575	Sig
PTL<34	Proteins	AUPR	490	24	0.0928035	0.0531703	0.0336959	0.0940805	NS
PTL<34	Proteins + Maternal characteristics	AUPR	490	24	0.0851827	0.0523411	0.0325046	0.0925272	NS
sPTB = spontaneous preterm birth. PTL = preterm labor. PPROM = preterm prelabor rupture of membranes. HA = high affinity. AUC = area under curve. AUPR = area under precision recall
*The AUC values presented here were obtained using a different 10-fold cross-validation split than those presented in Figure 7.
